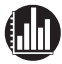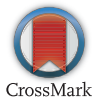

# Comparison of Insulin Degludec/Insulin Aspart and Biphasic Insulin Aspart 30 in Uncontrolled, Insulin-Treated Type 2 Diabetes: A Phase 3a, Randomized, Treat-to-Target Trial

*Diabetes Care* 2014;37:2084–2090 | DOI: 10.2337/dc13-2908

Gregory R. Fulcher,<sup>1</sup> Jens Sandahl Christiansen,<sup>2</sup> Ganapathi Bantwal,<sup>3</sup> Mirosława Polaszewska-Muszynska,<sup>4</sup> Henriette Mersebach,<sup>5</sup> Thomas H. Andersen,<sup>5</sup> and Leo K. Niskanen,<sup>6</sup> on behalf of the BOOST: Intensify Premix I Investigators

## OBJECTIVE

Insulin degludec/insulin aspart (IDegAsp) is the first combination of a basal insulin with an ultralong duration of action, and a rapid-acting insulin in a single injection. This trial compared IDegAsp with biphasic insulin aspart 30 (BIAsp 30) in adults with type 2 diabetes inadequately controlled with once- or twice-daily (OD or BID) pre- or self-mixed insulin with or without oral antidiabetic drugs.

## RESEARCH DESIGN AND METHODS

In this 26-week, randomized, open-label, multinational, treat-to-target trial, participants (mean age 58.7 years, duration of diabetes 13 years, BMI 29.3 kg/m<sup>2</sup>, and HbA<sub>1c</sub> 8.4% [68 mmol/mol]) were exposed (1:1) to BID injections of IDegAsp (*n* = 224) or BIAsp 30 (*n* = 222), administered with breakfast and the main evening meal and dose titrated to a self-measured premeal plasma glucose (PG) target of 4.0–5.0 mmol/L.

## RESULTS

After 26 weeks, mean HbA<sub>1c</sub> was 7.1% (54 mmol/mol) for both groups, with IDegAsp achieving the prespecified noninferiority margin for mean change in HbA<sub>1c</sub> (estimated treatment difference [ETD] –0.03% points [95% CI –0.18 to 0.13]). Treatment with IDegAsp was superior in lowering fasting PG (ETD –1.14 mmol/L [95% CI –1.53 to –0.76], *P* < 0.001) and had a significantly lower final mean daily insulin dose (estimated rate ratio 0.89 [95% CI 0.83–0.96], *P* = 0.002). Fewer confirmed, nocturnal confirmed, and severe hypoglycemia episodes were reported for IDegAsp compared with BIAsp 30.

## CONCLUSIONS

IDegAsp BID effectively improves HbA<sub>1c</sub> and fasting PG levels with fewer hypoglycemia episodes versus BIAsp 30 in patients with uncontrolled type 2 diabetes previously treated with once- or twice-daily pre- or self-mixed insulin.

<sup>1</sup>University of Sydney, Royal North Shore Hospital, Australia

<sup>2</sup>Aarhus University Hospital, Aarhus, Denmark

<sup>3</sup>St. Johns Medical College Hospital, Bangalore, India

<sup>4</sup>Bydgoszcz Diabetes and Endocrinology Center, Bydgoszcz, Poland

<sup>5</sup>Novo Nordisk A/S, Søborg, Denmark

<sup>6</sup>School of Medicine, University of Eastern Finland, Helsingfors, Finland

Corresponding author: Gregory R. Fulcher, greg.fulcher@sydney.edu.au.

Received 16 December 2013 and accepted 20 March 2014.

Clinical trial reg. no. NCT01009580, clinicaltrials.gov.

This article contains Supplementary Data online at <http://care.diabetesjournals.org/lookup/suppl/doi:10.2337/dc13-2908/-/DC1>.

© 2014 by the American Diabetes Association. Readers may use this article as long as the work is properly cited, the use is educational and not for profit, and the work is not altered.

Insulin is the most effective therapy for achieving glycemic control in patients with type 2 diabetes (1). Owing to the progressive nature of type 2 diabetes, many patients will become candidates for prescription of insulin—frequently basal insulin initially on a variable background of antidiabetic therapy. However, as type 2 diabetes progresses, further treatment intensification in the form of prandial insulin is commonly required to achieve HbA<sub>1c</sub> targets and potentially to avoid the long-term consequences of hyperglycemia (2). Currently, this approach is achieved through the addition of one or more separate prandial insulin injections to an existing basal insulin regimen or by switching to premixed insulin containing a fixed ratio of rapid- and intermediate-acting insulin (1). However, several barriers remain to insulin intensification. While separate basal and bolus injections offer the most precise and adaptable mealtime glycemic control (1), they can be perceived as complex (1,3–5). In some patients, this may result in an increased burden of treatments and decreased adherence to injections (6). Currently, available premix insulins offer a more convenient alternative, with fewer injections and the potential use of a single insulin pen device (7), but are associated with an increased rate of postmeal hypoglycemia, including nocturnal hypoglycemia (8). The fear of hypoglycemia represents a significant barrier to treatment (9,10). As a result, patients with type 2 diabetes may continue to have poor glucose control and an increased risk of developing diabetes-related complications (1).

Comprising 70% insulin degludec (IDeg) and 30% insulin aspart (IAsp), IDegAsp (Ryzodeg; Novo Nordisk A/S, Bagsværd, Denmark) is the first soluble combination product of a basal insulin with an ultralong duration of action and a rapid-acting insulin in a single injection. As a soluble coformulation, IDegAsp does not require resuspension, which eases administration (11) and, more importantly, eliminates the risk of incomplete mixing and therefore increased hypoglycemia (12). In solution, the individual components of IDegAsp exist separately as di-hexamers (IDeg) and hexamers (IAsp) (13). Upon injection, the IDeg di-hexamers assemble to form soluble and stable multihexamers

in the subcutaneous tissue that slowly dissociate to provide continuous IDeg absorption to meet basal needs. At the same time, IAsp hexamers immediately dissociate into monomers that are rapidly absorbed into the circulation, providing mealtime coverage (13,14). Pharmacodynamic studies have demonstrated that the glucose-lowering effect of IDegAsp is characterized by a distinct peak action (from IAsp) and a separate basal action (from IDeg). This is a closer approximation of physiological action than seen with current biphasic formulations. The long-acting basal component of IDegAsp allows for a pharmacodynamic profile that is flat and stable throughout the day, mimicking that of IDeg alone (14). The IDeg component in IDegAsp has been demonstrated to have a predictable glucose-lowering effect and up to four times lower day-to-day variability compared with insulin glargine at steady-state conditions (15). Clinical trials have demonstrated a lower risk of IDeg causing hypoglycemia compared with insulin glargine (16) and the possibility of flexibility in the timing of injections (17).

An earlier proof-of-concept study demonstrated favorable efficacy and safety profiles of IDegAsp as an add-on to metformin in insulin-naïve patients with type 2 diabetes inadequately controlled on oral antidiabetic drugs (OADs) (18). IDegAsp twice daily (BID) plus metformin provided overall glycemic control at lower insulin doses and significantly lower rates of hypoglycemia compared with the widely used premixed insulin, biphasic IAsp 30 (BIAsp 30) (NovoMix 30, NovoLog Mix 70/30; Novo Nordisk A/S) in combination with metformin in insulin-naïve patients with type 2 diabetes with an HbA<sub>1c</sub> of 7–11% (18). These phase 2 results, while promising, were limited by a relatively small sample size ( $n = 61$  in the IDegAsp arm;  $n = 60$  in BIAsp 30 arm) and short study duration (16 weeks).

In this phase 3a randomized, multinational clinical trial, the efficacy and safety of IDegAsp were compared with those of BIAsp 30 in adults with type 2 diabetes inadequately controlled on once-daily (OD) or twice-daily (BID) premixed or self-mixed insulin regimens with or without concomitant OADs.

## RESEARCH DESIGN AND METHODS

### Trial Design

A total of 50 sites in 10 countries (Australia, Denmark, Finland, India, Malaysia, Poland, Sweden, Taiwan, Thailand, and Turkey) participated in this multinational 26-week, phase 3a, open-label, randomized, treat-to-target trial.

The protocol, protocol amendments, consent form, and subject information sheet were reviewed and approved by health authorities according to local regulations and by the local independent ethics committees prior to trial initiation. This trial was performed in accordance with the Declaration of Helsinki and Good Clinical Practice (19). All study participants gave written consent prior to any trial-related activities, and the investigator retained the consent forms.

### Trial Population

Adults with a clinical diagnosis of type 2 diabetes for  $\geq 6$  months were enrolled if they had an HbA<sub>1c</sub> of 7–10% (53–86 mmol/mol), had a BMI of  $\leq 40$  kg/m<sup>2</sup>, and were  $\geq 18$  years of age. Patients were on premixed human or analog insulin or self-mixed insulin regimens containing 20–40% fast-/rapid-acting component, administered OD or BID with or without OADs (metformin, sulfonylureas, glinides,  $\alpha$ -glucosidase inhibitors, DPP-4 inhibitors, or pioglitazone) for  $\geq 3$  months prior to trial initiation.

Patients were excluded if they had received treatment in the 3 months prior to trial initiation with other insulin regimens, rosiglitazone, or a glucagon-like peptide 1 receptor agonist or a history of recurrent severe hypoglycemia (more than one severe hypoglycemic episode during the past 12 months) or hypoglycemic unawareness. Patients were also excluded if they had cardiovascular disease (heart failure: New York Heart Association class III or IV, unstable angina pectoris, or a myocardial infarction) within 6 months preceding trial and uncontrolled severe hypertension (systolic blood pressure  $\geq 180$  mmHg or sitting diastolic blood pressure  $\geq 100$  mmHg).

### Randomization

After randomization, eligible patients discontinued their diabetic treatment except for metformin, DPP-4 inhibitors, and pioglitazone and were switched from their prior insulin to IDegAsp or

**BIAsp 30.** Patients were randomized (1:1) to BID injections of IDegAsp (100 units/mL Ryzodeg) or BIAsp 30 (100 units/mL NovoMix 30, NovoLog 70/30) either with or without OADs (metformin with or without dipeptidyl peptidase [DPP]-4 inhibitors with or without pioglitazone) for 26 weeks. Randomization was stratified based on the number of daily insulin injections at screening to ensure equal distribution of insulin regimens in the two treatment groups. As BIAsp 30 requires resuspension prior to injection, whereas IDegAsp does not, the trial design could not be blinded and was therefore open-label.

### Treatment and Titration

Patients on premixed insulin BID were to transfer their prebreakfast and pre-main evening meal dose 1:1 to trial insulin. Patients on a self-mixed regimen were to transfer to trial insulin at doses corresponding to their respective self-mixed premeal dose. Patients previously receiving premixed or self-mixed insulin OD were to divide their dose into two equal doses of IDegAsp or BIAsp 30 for prebreakfast and pre-main evening meal administration. During the treatment period, insulin dose was titrated based on the mean prebreakfast and pre-main evening meal plasma glucose (PG) level from the preceding 3 days. Titration of pre-main evening meal insulin doses was based on the individual subject's mean prebreakfast glucose values. Treatment of prebreakfast insulin doses were based on the subject's mean pre-main evening meal glucose values. In both cases, titration was to a self-measured PG target of 4.0–5.0 mmol/L.

Insulins were administered subcutaneously (abdomen, deltoid, or thigh for IDegAsp; thigh or abdominal wall for BIAsp 30) with breakfast and main evening meals. The injection region was kept the same for the duration of the trial, and all insulin products were administered by the FlexPen insulin delivery device (Novo Nordisk A/S). Pretrial OAD dose levels remained unchanged during the treatment period.

### Trial End Points

The primary efficacy end point was change from baseline in HbA<sub>1c</sub> after 26 weeks of treatment. Secondary efficacy end points included the change from

baseline in fasting PG (FPG) and the changes in nine-point self-measured PG (SMPG) profiles. Other secondary end points included the proportion of patients achieving HbA<sub>1c</sub> <7.0% (53 mmol/mol) at the end of the trial, the number of responders without hypoglycemic episodes (defined as HbA<sub>1c</sub> <7.0% at end of trial with no severe or minor hypoglycemic episodes during the last 12 weeks of treatment and including only patients exposed for ≥12 weeks), and the change from baseline in body weight.

Safety variables included hypoglycemic episodes, insulin dose, adverse events, and standard laboratory-measured safety measures. Hypoglycemia was classified as severe (requiring assistance from another person) or confirmed (PG measurement of <3.1 mmol/L [56 mg/dL] or classification as severe hypoglycemia). Nocturnal confirmed hypoglycemia included episodes with time of onset from 0001 h to 0559 h.

### Statistical Analyses

The primary objective of this trial was to demonstrate noninferiority of IDegAsp to BIAsp 30 (noninferiority limit of 0.4%), as assessed by change in HbA<sub>1c</sub> from baseline after 26 weeks. If noninferiority was confirmed for the primary end point, a number of confirmatory secondary end points were to be tested to assess for superiority of IDegAsp over BIAsp 30. The primary efficacy end point of change from baseline in HbA<sub>1c</sub> after 26 weeks of treatment was analyzed using an ANOVA with treatment, antidiabetic therapy at screening, sex and region as fixed factors, and age and baseline HbA<sub>1c</sub> as covariates. Change from baseline in FPG, body weight, and PG was analyzed using the ANOVA method, similarly to the primary end point.

The number of hypoglycemic episodes was analyzed using a negative binomial regression model with a log-link function and the logarithm of the time period in which a hypoglycemic episode was considered treatment emergent as offset. The model included treatment, antidiabetic therapy, sex, and region as fixed factors; age as a covariate; and exposure as offset.

A post hoc analysis was performed to examine hypoglycemia rates during the

maintenance period after stable glycaemic control and insulin dose had been achieved. The design of this post hoc analysis, including the segmentation of the overall trial period into titration (0–15 weeks) and maintenance (16–26 weeks) periods, matched that of an earlier preplanned meta-analysis of all IDeg phase 3a clinical trials (16).

Other adverse events were analyzed using descriptive statistics.

## RESULTS

### Patient Characteristics

Of the 661 patients enrolled into the study, 447 were randomized to receive either IDegAsp or BIAsp 30; one patient in the BIAsp 30 group was withdrawn prior to receiving insulin treatment, as they did not fulfill the inclusion criteria (Fig. 1). Baseline characteristics were comparable between the two treatment groups including level of glycaemic control, duration of diabetes, BMI, and previous therapies (Table 1 and Supplementary Table 1).

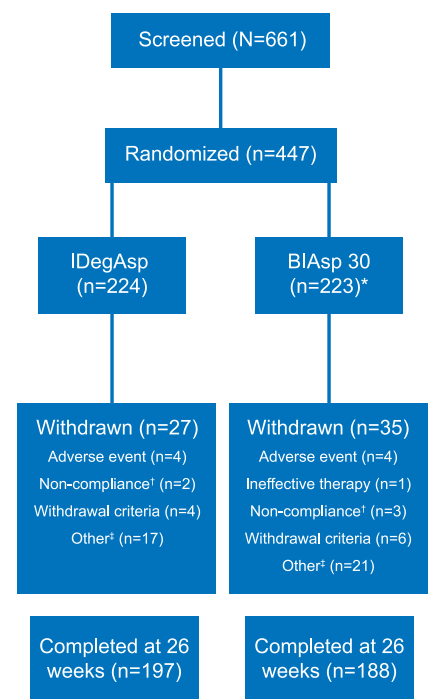

**Figure 1**—Trial flow diagram. \*One participant randomized to BIAsp 30 was excluded from the trial before receiving insulin treatment, as the participant did not fulfill the inclusion criteria. †Noncompliance with protocol-specified dosing of drug. ‡Other, violation of inclusion/exclusion criteria, withdrawal on informed consent, lost to follow-up, and other reasons.

**Table 1—Characteristics of randomized population**

| Characteristic                           | IDegAsp     | BIAsp 30    |
|------------------------------------------|-------------|-------------|
| <i>n</i>                                 | 224         | 222         |
| Male/female, %                           | 58/42       | 54/46       |
| Age, years                               | 58.7 (9.9)  | 58.8 (9.8)  |
| Weight, kg                               | 81.5 (18.1) | 78.9 (17.6) |
| BMI, kg/m <sup>2</sup>                   | 29.6 (4.6)  | 29.0 (4.9)  |
| Duration of diabetes, years              | 12.8 (6.8)  | 13.1 (7.4)  |
| HbA <sub>1c</sub> , %                    | 8.3 (0.8)   | 8.4 (0.9)   |
| FPG, mmol/L                              | 8.9 (2.9)   | 8.6 (2.6)   |
| Prestudy insulin regimen, <i>n</i> (%)   |             |             |
| Premixed or self-mixed OD $\pm$ OADs     | 16 (7.1)    | 12 (5.4)    |
| Premixed or self-mixed BID $\pm$ OADs    | 203 (90.6)  | 206 (92.8)  |
| Basal bolus $\pm$ OADs                   | 4 (1.8)     | 3 (1.4)     |
| Only OADs*                               | 1 (0.4)     | —           |
| Premixed or self-mixed three times daily | —           | 1 (0.5)     |
| OAD (1 only)                             | 125 (55.8)  | 138 (62.2)  |
| $\alpha$ -Glucosidase inhibitor          | 2 (0.9)     | 3 (1.4)     |
| Biguanide                                | 117 (52.2)  | 125 (56.3)  |
| Sulfonylurea                             | 4 (1.8)     | 10 (4.5)    |
| Thiazolidinedione                        | 2 (0.9)     | —           |
| 2 OADs                                   | 40 (17.9)   | 33 (14.9)   |
| >2 OADs                                  | 8 (3.6)     | 8 (3.6)     |

Data are mean (SD) unless otherwise indicated. \*This individual was randomized in error and was later withdrawn from the trial without being exposed to the trial drug.

### Glycemic Control

After 26 weeks of treatment, the observed mean  $\pm$  SD HbA<sub>1c</sub> decreased from 8.3  $\pm$  0.8% at baseline to 7.1  $\pm$  0.9% with IDegAsp and from 8.4  $\pm$  0.9% at baseline to 7.1  $\pm$  0.9% with BIAsp 30 (Fig. 2A). For the primary end point of mean change from baseline in HbA<sub>1c</sub>, IDegAsp was noninferior to BIAsp 30 (estimated treatment difference [ETD]  $-0.03\%$  points [95% CI  $-0.18$  to  $0.13$ ]). The proportion of patients achieving HbA<sub>1c</sub> targets of  $<7.0\%$  (53 mmol/mol) was comparable between IDegAsp (50.4%) and BIAsp 30 (48.6%). The odds of achieving this target without hypoglycemic episodes during the last 12 weeks were 60% higher for IDegAsp (21% of patients) than for BIAsp 30 (14% of patients): odds ratio 1.60 (95% CI 0.94–2.72) (Supplementary Fig. 1).

Observed mean (SD) FPG decreased from 8.9  $\pm$  2.9 mmol/L at baseline to 5.8  $\pm$  1.9 mmol/L for IDegAsp and from 8.6  $\pm$  2.6 mmol/L to 6.8  $\pm$  2.4 mmol/L for BIAsp 30 (Fig. 2B). IDegAsp was superior to BIAsp 30 in lowering FPG (ETD  $-1.14$  mmol/L [95% CI  $-1.53$  to  $-0.76$ ],  $P < 0.001$ ).

After 26 weeks, mean SMPG levels before breakfast (ETD  $-0.51$  mmol/L [95% CI  $-0.88$  to  $-0.14$ ]), 90 min after

breakfast (ETD  $-0.98$  mmol/L [95% CI  $-1.58$  to  $-0.39$ ]), and before breakfast the following day (ETD  $-0.85$  mmol/L [95% CI  $-1.21$  to  $-0.48$ ]) were significantly lower with IDegAsp compared with BIAsp 30. Similarly, the overall mean glucose level at 26 weeks (as evaluated by SMPG levels) was significantly lower with IDegAsp compared with BIAsp 30 (ETD  $-0.4$  mmol/L [95% CI  $-0.75$  to  $-0.05$ ]) (Supplementary Fig. 2).

A numerically higher proportion of patients in the IDegAsp group compared with the BIAsp 30 group (37.9% vs. 23.0%) reached the prebreakfast target of  $<5$  mmol/L. The proportion of patients achieving the same SMPG target predinner was comparable between the two insulin groups (14.7% vs. 13.1% for IDegAsp and BIAsp 30, respectively).

### Body Weight

The observed body weight change from baseline to week 26 with IDegAsp (increase of 1.7 kg) was statistically significantly lower than with BIAsp 30 (increase of 2.2 kg) (ETD  $-0.62$  kg [95% CI  $-1.15$  to  $-0.10$ ]).

### Insulin Dose

Mean daily insulin dose after 26 weeks was 1.08 units/kg for IDegAsp and 1.20

units/kg for BIAsp 30 (estimated rate ratio [RR] 0.89 [95% CI 0.83–0.96],  $P = 0.002$ ). Mean morning and evening doses after 26 weeks were 38 units and 52 units for IDegAsp (a 42% and 58% dose split) and 44 units and 54 units for BIAsp 30 (45% and 55% dose split), respectively.

### Hypoglycemic Episodes

Confirmed hypoglycemia (severe or PG  $<3.1$  mmol/L) was reported for 66.1% and 68.9% of patients in the IDegAsp and BIAsp 30 groups, respectively (Table 2). Superiority of IDegAsp versus BIAsp 30 was demonstrated with a 32% reduction in confirmed hypoglycemic episodes: 9.7 vs. 14.0 episodes per patient-year for IDegAsp and BIAsp 30 groups, respectively (estimated RR 0.68 [95% CI 0.52–0.89],  $P = 0.0049$ ) (Fig. 2C). A significant 73% reduction in nocturnal confirmed hypoglycemia was observed for IDegAsp versus BIAsp 30: 0.7 vs. 2.5 episodes per year, respectively (RR 0.27 [95% CI 0.18–0.41],  $P < 0.0001$ ) (Fig. 2D). Severe hypoglycemia was infrequent in both treatment groups (IDegAsp, 3.1%; BIAsp 30, 7.2%) with rates of 0.09 and 0.25 events per year, representing a 50% numerical reduction for IDegAsp (RR 0.50 [95% CI 0.19–1.30],  $P =$  not significant).

In a post hoc analysis of the maintenance period of treatment (from 16 weeks to end of trial after stable glycemic control and insulin dose had been achieved), statistically significant and more pronounced reductions were seen in all hypoglycemia categories. More specifically, a 39% reduction in overall confirmed hypoglycemia (RR 0.61 [95% CI 0.45–0.83],  $P = 0.0015$ ), 77% reduction in nocturnal confirmed hypoglycemia (RR 0.23 [95% CI 0.13–0.41],  $P < 0.0001$ ), and an 89% reduction in severe hypoglycemic episodes (RR 0.11 [95% CI 0.01–0.91],  $P = 0.04$ ) were observed for IDegAsp compared with BIAsp 30.

### Adverse Events

The incidence of adverse events was similar between IDegAsp and BIAsp 30 (65.6% vs. 63.1%), with the majority being mild to moderate in severity. Serious adverse events were reported in 19 and 36 patients in the IDegAsp and BIAsp 30 treatment groups, respectively, the majority of whom recovered completely. Two deaths



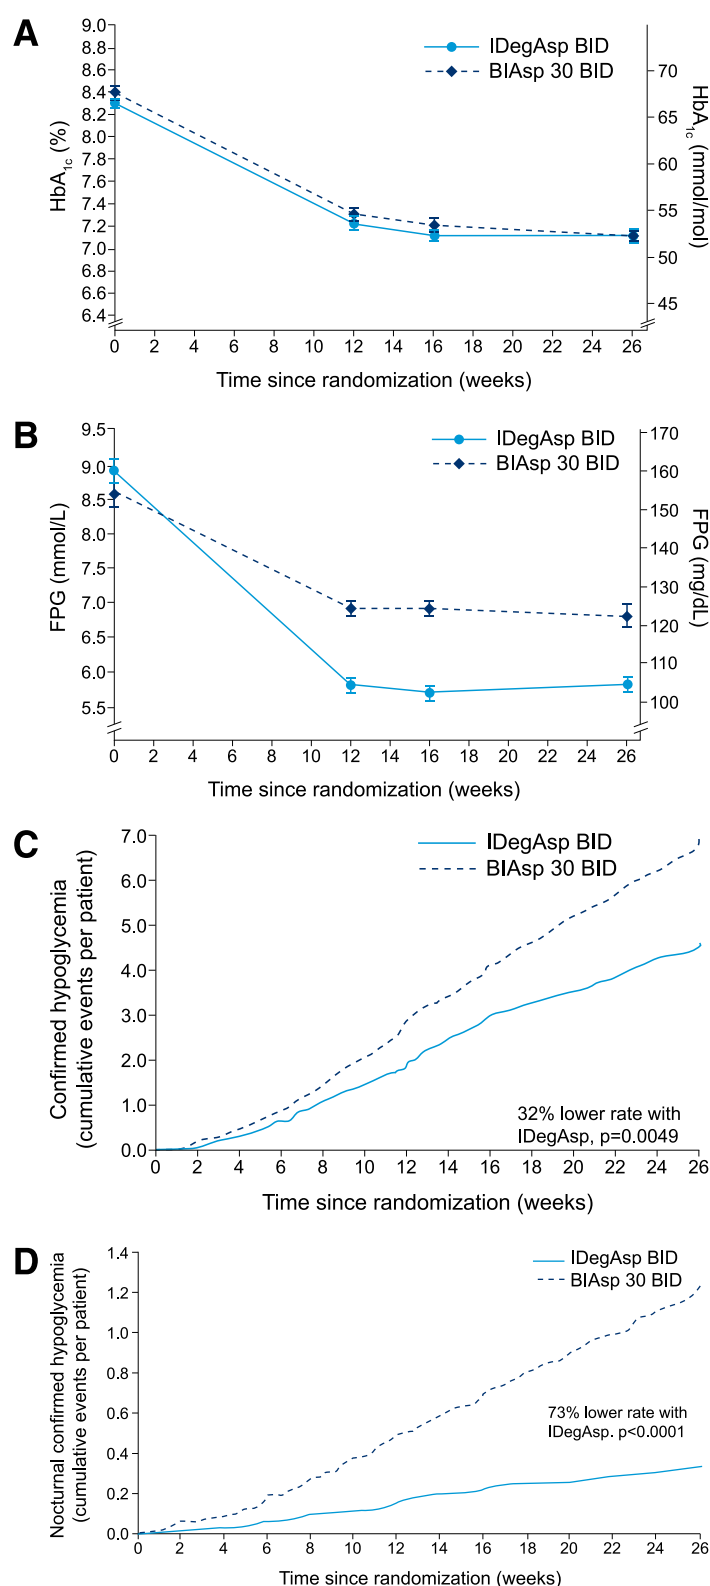

**Figure 2**—Clinical endpoints. *A*: Mean HbA<sub>1c</sub> over time. *B*: Mean FPG over time. *C*: Cumulative rate of confirmed hypoglycemic episodes. *D*: Cumulative rate of nocturnal confirmed hypoglycemic episodes.

were reported in this trial (interstitial lung disease in the IDegAsp group and head injury in the BIAsp 30 group).

The most frequent adverse events in both treatment groups were nasopharyngitis, upper-respiratory tract infection,

and headache. Injection site reactions were low in both treatment groups (IDegAsp, 0.4%; BIAsp 30, 0.9%; two events in each group). No clinically relevant differences were observed between the two treatment groups with respect to physical examination findings, vital signs, standard laboratory analyses (hematology and biochemistry), fundoscopy, or electrocardiogram.

## CONCLUSIONS

This confirmatory, randomized, controlled, 26-week, phase 3a trial demonstrated the efficacy and safety of IDegAsp BID, with or without concomitant OADs, in the treatment of patients with type 2 diabetes inadequately controlled on premixed or self-mixed insulin regimens OD or BID. IDegAsp provided effective overall glycemic control that was noninferior and comparable with that of BIAsp 30, with both treatments achieving clinically meaningful improvements in HbA<sub>1c</sub> of ~1.3% points. Moreover, IDegAsp demonstrated superior reductions in FPG for IDegAsp, in combination with an 11% lower mean end of trial dose compared with BIAsp 30.

The efficacy of IDegAsp is further supported by the results from the nine-point SMPG profile reported in the current trial, with significantly lower mean PG levels at end of trial and significantly lower PG levels at three out of the nine time points: before breakfast, 90 min after breakfast, and before breakfast the following day. The treatment differences in FPG and prebreakfast SMPG indicate that IDegAsp provides full 24-h basal coverage compared with BIAsp 30.

Importantly, the greater reduction in FPG was accompanied by reductions in confirmed (32%), nocturnal confirmed (73%), and severe (50%) hypoglycemia, verifying previous findings of a lower risk of IDegAsp to cause hypoglycemia compared with premixed insulin (18). The percentage of patients achieving HbA<sub>1c</sub> <7% without hypoglycemia in the previous 12 weeks was greater for IDegAsp versus BIAsp 30 (Supplementary Fig. 1). Furthermore, the differences in hypoglycemia rates in favor of IDegAsp (39%, 77%, and 89% reduction in overall confirmed, nocturnal confirmed, and severe hypoglycemic episodes, respectively, compared with

**Table 2—Hypoglycemic episodes in the IDegAsp and BIAsp 30 groups**

|                                                                                                                             | IDegAsp BID  |      |          |              | BIAsp 30 BID |      |          |              | Estimated RR (95% CI):<br>IDegAsp/BIAsp 30 | <i>P</i> |
|-----------------------------------------------------------------------------------------------------------------------------|--------------|------|----------|--------------|--------------|------|----------|--------------|--------------------------------------------|----------|
|                                                                                                                             | Participants |      |          | Rate:<br>PYE | Participants |      |          | Rate:<br>PYE |                                            |          |
|                                                                                                                             | <i>n</i>     | %    | Episodes |              | <i>n</i>     | %    | Episodes |              |                                            |          |
| Safety analysis set: entire trial period                                                                                    |              |      |          |              |              |      |          |              |                                            |          |
| Severe                                                                                                                      | 7            | 3.1  | 9        | 0.09         | 16           | 7.2  | 25       | 0.25         | 0.50 (0.19–1.30)                           | NS       |
| Overall confirmed                                                                                                           | 148          | 66.1 | 993      | 9.72         | 153          | 68.9 | 1,379    | 13.96        | 0.68 (0.52–0.89)                           | 0.0049   |
| Nocturnal confirmed                                                                                                         | 52           | 23.2 | 76       | 0.74         | 80           | 36.0 | 250      | 2.53         | 0.27 (0.18–0.41)                           | <0.0001  |
| Patients in safety analysis set with at<br>least 16 weeks of exposure: maintenance<br>period (16 weeks to end of treatment) |              |      |          |              |              |      |          |              |                                            |          |
| Severe                                                                                                                      | 1            | 0.5  | 1        | 0.03         | 10           | 5.2  | 13       | 0.36         | 0.11 (0.01–0.91)                           | 0.04     |
| Overall confirmed                                                                                                           | 104          | 51.7 | 362      | 9.51         | 113          | 58.9 | 550      | 15.20        | 0.61 (0.45–0.83)                           | 0.0015   |
| Nocturnal confirmed                                                                                                         | 21           | 10.4 | 27       | 0.71         | 47           | 24.5 | 109      | 3.01         | 0.23 (0.13–0.41)                           | <0.0001  |

NS, not significant; PYE, patient-year of exposure.

BIAsp 30) are more pronounced during the maintenance period of treatment (after  $\geq 16$  weeks of exposure when stable glycemic control and insulin dose have been achieved), which represents the majority of a patients' treatment time in clinical practice (Supplementary Tables 2 and 3).

The observed lower hypoglycemic risk with IDegAsp is likely related to its pharmacodynamic profile, which consists of a distinct prandial action and a separate, flat, and stable glucose-lowering effect. This is in contrast to the glucose infusion profile of BIAsp 30, which is a formulation containing soluble (30%) and protaminated (70%) IAsp. Protaminated IAsp in BIAsp 30 exhibits an initial peak followed by a gradual decline, falling below detectable levels  $\sim 20$  h postdose (14). The basal component of IDegAsp has been demonstrated in pharmacodynamics studies to have an ultralong duration of action, exceeding 42 h (14). Therefore, IDegAsp provides full 24-h coverage of basal insulin requirements as shown by a distinct peak action due to prandial IAsp and separate and stable basal action from IDeg (20). The low variability of the IDeg component reported at steady state over a 24 h period (12,21) could further contribute to the low rates of hypoglycemia observed with IDegAsp.

Basal insulin and premixed insulin are the most common treatment regimens used when initiating insulin treatment in patients with type 2 diabetes (22). Currently, when insulin intensification is required (to provide sufficient prandial coverage) this is often achieved through

use of premixed insulin. However, pharmacodynamic studies have shown that premixed insulin does not provide 24 h glycemic control in all patients and, moreover, is associated with higher variability and a lack of sustained and stable glucose infusion rate profile (23). On the other hand, basal-bolus insulin therapy requires multiple daily injections and frequent blood glucose measurements and, hence, is a more complex treatment regimen. Use of a "basal plus" regimen (involving basal insulin and addition of a single bolus insulin injection) has recently demonstrated similar HbA<sub>1c</sub> control with improved FPG, less weight gain, lower rates of hypoglycemia, and lower total daily insulin use compared with twice-daily premixed insulin in insulin-naïve patients (24). Similar benefits are demonstrated for IDegAsp versus BIAsp 30 in the current publication and highlight, in insulin-experienced patients, the advantage of full 24-h basal coverage and distinct rapid-acting mealtime coverage with the additional simplicity of being combined in a single injection. This may help to address the commonly cited issues of complexity and inconvenience as barriers to timely insulin intensification (22) without the need to compromise prandial or basal insulin coverage in patients with type 2 diabetes.

**Duality of Interest.** Medical writing support was provided by ApotheCom ScopeMedical Ltd and funded by Novo Nordisk A/S. This study was funded by Novo Nordisk A/S. G.R.F. has served on advisory panels for Novo Nordisk, Janssen, Boehringer Ingelheim, and Merck Sharp & Dohme (MSD) and has served on speakers'

bureaus for Novo Nordisk, Boehringer Ingelheim, and MSD. J.S.C. has served on advisory panels and speakers' bureaus for Novo Nordisk. G.B. has undertaken paid lecturing for Novo Nordisk. M.P.-M. has received research support from Novo Nordisk, MSD, and Johnson & Johnson. H.M. is an employee and shareholder of Novo Nordisk. T.H.A. is an employee of Novo Nordisk. No other potential conflicts of interest relevant to this article were reported.

**Author Contributions.** G.R.F. designed the study, performed the research, and edited the manuscript. J.S.C. designed the study and contributed to the manuscript. G.B. performed the research. M.P.-M. contributed to the manuscript. H.M. designed the study, analyzed data, and edited the manuscript. T.H.A. contributed to the manuscript and analyzed data. L.K.N. performed the research and contributed to the manuscript. G.R.F. is the guarantor of this work and, as such, had full access to all the data in the study and takes responsibility for the integrity of the data and the accuracy of the data analysis.

## References

1. Inzucchi SE, Bergenstal RM, Buse JB, et al.; American Diabetes Association (ADA); European Association for the Study of Diabetes (EASD). Management of hyperglycemia in type 2 diabetes: a patient-centered approach: position statement of the American Diabetes Association (ADA) and the European Association for the Study of Diabetes (EASD). *Diabetes Care* 2012; 35:1364–1379
2. Holman RR, Farmer AJ, Davies MJ, et al.; 4-T Study Group. Three-year efficacy of complex insulin regimens in type 2 diabetes. *N Engl J Med* 2009;361:1736–1747
3. Ross SA, Tildesley HD, Ashkenas J. Barriers to effective insulin treatment: the persistence of poor glycemic control in type 2 diabetes. *Curr Med Opin* 2011;27(Suppl. 3):13–20
4. Wild D, von Maltzahn R, Brohan E, Christensen T, Clauson P, Gonder-Frederick L. A critical review of the literature on fear of hypoglycemia in diabetes: Implications for diabetes management and patient education. *Patient Educ Couns* 2007;68:10–15
5. Nathan DM, Buse JB, Davidson MB, et al.; American Diabetes Association; European

- Association for Study of Diabetes. Medical management of hyperglycemia in type 2 diabetes: a consensus algorithm for the initiation and adjustment of therapy: a consensus statement of the American Diabetes Association and the European Association for the Study of Diabetes. *Diabetes Care* 2009;32:193–203
6. Vijan S, Hayward RA, Ronis DL, Hofer TP. Brief report: the burden of diabetes therapy: implications for the design of effective patient-centered treatment regimens. *J Gen Intern Med* 2005;20:479–482
  7. Garber AJ, Ligthelm R, Christiansen JS, Liebl A. Premixed insulin treatment for type 2 diabetes: analogue or human? *Diabetes Obes Metab* 2007;9:630–639
  8. Liebl A, Prusty V, Valensi P, et al. Ten years of experience with biphasic insulin aspart 30: from drug development to the latest clinical findings. *Drugs* 2012;72:1495–1520
  9. Leiter LA, Yale J-F, Chiasson J-L, et al. Assessment of the impact of fear of hypoglycemic episodes on glycemic and hypoglycemia management. *Can J Diabetes* 2005;29:186–192
  10. Peyrot M, Barnett AH, Meneghini LF, Schumm-Draeger PM. Insulin adherence behaviours and barriers in the multinational Global Attitudes of Patients and Physicians in Insulin Therapy study. *Diabet Med* 2012;29:682–689
  11. Jonassen I, Hoeg-Jensen S, Havelund S, Ribel U. Ultra-long acting insulin degludec can be combined with rapid-acting insulin aspart in a soluble co-formulation (Abstract). *J Pept Sci* 2010;16(Suppl. 1):A380
  12. Kaiser P, Maxeiner S, Weise A, et al. Assessment of the mixing efficiency of neutral protamine Hagedorn cartridges. *J Diabetes Sci Tech* 2010;4:652–657
  13. Havelund S, Ribel U, Hubálek F, et al. Insulin degludec (IDeg) and insulin aspart (IAsp) can be co-formulated such that the formation of IDeg multi-hexamers and IAsp monomers is retained upon s.c. injection (Abstract). *Diabetes* 2013;62(Suppl. 1):A241
  14. Heise T, Nosek L, Hastrup H, et al. IDegAsp shows distinct prandial and basal glucose-lowering effects at steady state in subjects with type 1 diabetes (Abstract). *Diabetes* 2013;62(Suppl. 1):A235
  15. Heise T, Nosek L, Böttcher SG, Hastrup H, Haahr H. Ultra-long-acting insulin degludec has a flat and stable glucose-lowering effect in type 2 diabetes. *Diabetes Obes Metab* 2012;14:944–950
  16. Ratner RE, Gough SC, Mathieu C, et al. Hypoglycaemia risk with insulin degludec compared with insulin glargine in type 2 and type 1 diabetes: a pre-planned meta-analysis of phase 3 trials. *Diabetes Obes Metab* 2013;15:175–184
  17. Meneghini L, Atkin SL, Gough SC, et al.; NN1250-3668 (BEGIN FLEX) Trial Investigators. The efficacy and safety of insulin degludec given in variable once-daily dosing intervals compared with insulin glargine and insulin degludec dosed at the same time daily: a 26-week, randomized, open-label, parallel-group, treat-to-target trial in individuals with type 2 diabetes. *Diabetes Care* 2013;36:858–864
  18. Niskanen L, Leiter LA, Franek E, et al. Comparison of a soluble co-formulation of insulin degludec/insulin aspart vs biphasic insulin aspart 30 in type 2 diabetes: a randomised trial. *Eur J Endocrinol* 2012;167:287–294
  19. International Conference on Harmonisation of Technical Requirements for Registration of Pharmaceuticals for Human Use Guideline for Good Clinical Practice guidelines. Available from [http://www.ich.org/fileadmin/Public\\_Web\\_Site/ICH\\_Products/Guidelines/Efficacy/E6\\_R1/Step4/E6\\_R1\\_Guideline.pdf](http://www.ich.org/fileadmin/Public_Web_Site/ICH_Products/Guidelines/Efficacy/E6_R1/Step4/E6_R1_Guideline.pdf). Accessed 11 April 2014
  20. Heise T, Nosek L, Klein O, et al. IDegAsp produces dose-proportional glucose-lowering effect in subjects with type 1 diabetes (Abstract). *Diabetes* 2013;62(Suppl. 1):A241
  21. Kurtzhals P, Heise T, Strauss HM, et al. Multi-hexamer formation is the underlying basis for the ultra-long glucose-lowering effect of insulin degludec (Abstract). *Diabetologia* 2011;54:A1049
  22. Vaag A, Lund SS. Insulin initiation in patients with type 2 diabetes mellitus: treatment guidelines, clinical evidence and patterns of use of basal vs premixed insulin analogues. *Eur J Endocrinol* 2012;166:159–170
  23. Heise T, Nosek L, Coester HV, et al. Insulin degludec/insulin aspart produces a dose-proportional glucose-lowering effect in subjects with type 1 diabetes. *International Diabetes Federation*, 2–6 December 2013, poster P-1400
  24. Riddle MC, Rosenstock J, Vlahinic A, Gao L. Randomized, 1-year comparison of three ways to initiate and advance insulin for type 2 diabetes: twice-daily premixed insulin versus basal insulin with either basal-plus one prandial insulin or basal-bolus up to three prandial injections. *Diabetes Obes Metab* 2014;16:396–402
